# Supplementary material for: A Genome-Wide Identification and Expression Pattern of LMCO Gene Family from Turnip (Brassica rapa L.) under Various Abiotic Stresses
Source: MDPI journal article supplement (doi:10.3390/plants12091904), 2023-05-07
Supplement: s1 [file s1]

**Table S1. Groups base on the phylogenetic tree and motifs analysis of *Arabidopsis* and *Brassica* LMCO genes**

| S.No | <i>Arabidopsis</i> LMCO genes | <i>Brassica rapa</i> LMCO genes | Group |
|------|-------------------------------|---------------------------------|-------|
| 1    | At2g29130 (At-Lac2)           | XP_009144396.1 (Br-Lac2)        | 1     |
| 2    | At5g60020 (At-Lac17)          | XP_009131958.1 (Br-Lac17)       |       |
| 3    | At2g38080 (At-Lac4)           | XP_033148764.1 (Br-Lac4)        | 2     |
| 4    | At5g01190 (At-Lac10)          | XP_009125430.1 (Br-Lac10)       |       |
| 5    | At5g03260 (At-Lac11)          | XP_009125488.1 (Br-Lac11)       |       |
| 6    | At5g58910 (At-Lac16)          | XP_009120399.1 (Br-Lac16)       |       |
| 7    |                               | XP_009146739 (Br-Lac22)         |       |
| 8    | At2g30210 (At-Lac3)           | XP_009144319.1 (Br-Lac3)        | 3     |
| 9    | At2g40370 (At-Lac5)           | XP_009143220.1 (Br-Lac5)        |       |
| 10   | At5g05390 (At-Lac12)          | XP_009125599.1 (Br-Lac12)       |       |
| 11   | At5g07130 (At-Lac13)          | XP_009122370.1 (Br-Lac13)       |       |
| 12   | At5g09360 (At-Lac14)          | XP_009122510.1 (Br-Lac14)       | 4     |
| 13   | At5g48100 (At-Lac15)          | XP_009129702.1 (Br-Lac15)       |       |
| 14   | At3g09220 (At-Lac7)           | XP_009146941.1 (Br-Lac7)        | 5     |
| 15   | At5g01040 (At-Lac8)           | XP_033142360.1 (Br-Lac8)        |       |
| 16   | At5g01050 (At-Lac9)           | XP_009132200.3 (Br-Lac9)        |       |
| 17   | At1g18140 (At-Lac1)           | XP_009110363.1 (Br-Lac1)        | 6     |
| 18   | At2g46570 (At-Lac6)           | XP_009142428.1 (Br-Lac6)        | 7     |

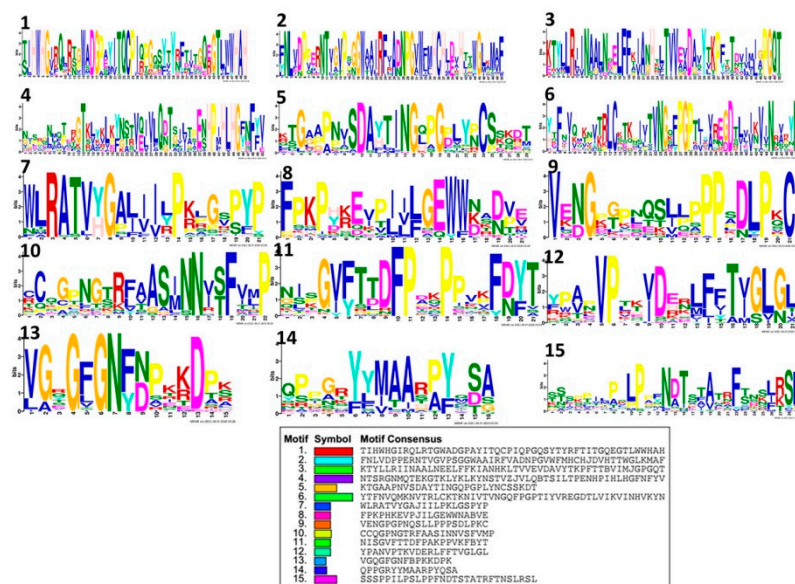

**Figure S1.** Fifteen conserved motifs were identified in *Arabidopsis* and *Brassica* LMCO proteins using the MEME tool and MEME suite web server to acquire the logos.

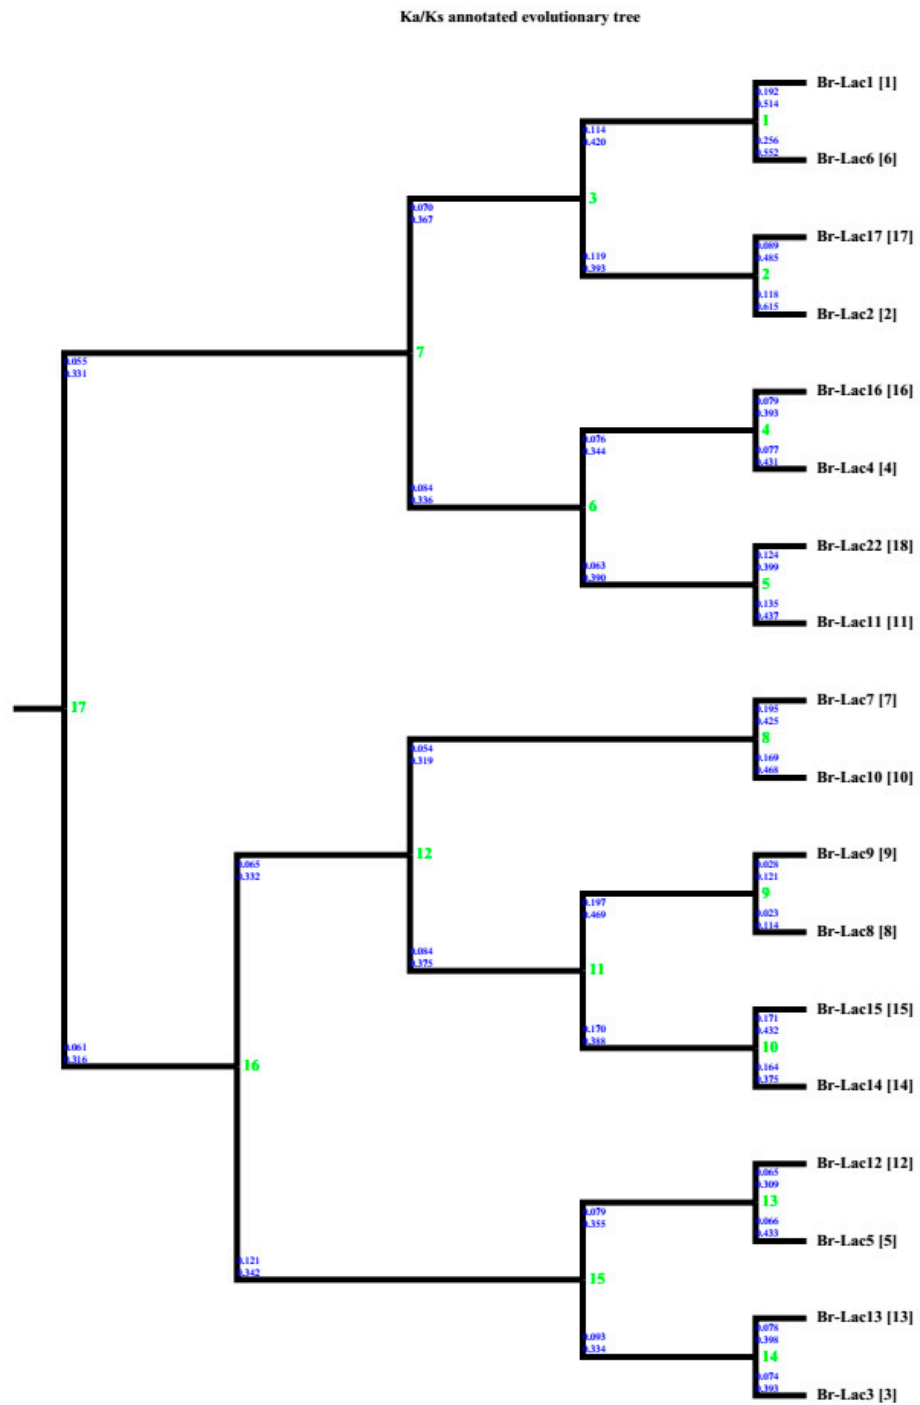

Figure S2. Pair of paralogous Br-Lac genes according to the phylogenetic tree server.

**Table S2. List of LMCO genes primers for qRT-PCR.**

| S.no | Gene name | Sequence ID |                        |
|------|-----------|-------------|------------------------|
| 1    | Br-Lac-1  | F           | GAGGATGGGCGGCGATTAGGAT |
|      |           | R           | CACGAGGAGGACGAAGCAGAGT |
| 2    | Br-Lac-2  | F           | AACTTACGGCATCAACGCAGAA |
|      |           | R           | TGTCACATACGACGGTCCATCC |
| 3    | Br-Lac-3  | F           | TCGTCTCGGCTCTCCTTATCCA |
|      |           | R           | GGTGGTTGGCGACTGAGAAGAA |
| 4    | Br-Lac-4  | F           | CAAGCCAACCGTGACCGTGAA  |
|      |           | R           | ATGTGAGCGTGCCACCAGAGA  |
| 5    | Br-Lac-5  | F           | CACTGGCACGGTGTGAGACAA  |
|      |           | R           | CGGAGGAAGGACGAGGAGTGAA |
| 6    | Br-Lac-6  | F           | TGTCTCCTCCTTGCTCCGTCTT |
|      |           | R           | GCACAGCCTGGTGAGTCTCATT |
| 7    | Br-Lac-7  | F           | CCACCAGAGGCGTCATCCACTA |
|      |           | R           | GAGCAGTTGGCGTGTCAAGAA  |
| 8    | Br-Lac-8  | F           | ACGCACTTCTCACGGCTGAC   |
|      |           | R           | TATGGTCCACCCACGAGGCTAG |
| 9    | Br-Lac-9  | F           | CGGCACTCAACACTCACCTCT  |
|      |           | R           | CGGCGTCAAGATCATCACATCG |
| 10   | Br-Lac-10 | F           | CCTTCACCACCGACACAATCCT |
|      |           | R           | GAATGGAGCGGCGGCGATTA   |
| 11   | Br-Lac-11 | F           | GCCTCCGATGTCAGATGCTCAT |
|      |           | R           | CGATCTCCACCACGGTCATGTC |
| 12   | Br-Lac-12 | F           | TGTTCCCTTCTCTCCGCCTCAT |
|      |           | R           | TCTGCCTCACACCATGCCAATG |
| 13   | Br-Lac-13 | F           | CTGACAGTGGTTGCTGCGGATG |
|      |           | R           | AGTAGTGTGCTGGCGGTTGGT  |
| 14   | Br-Lac-14 | F           | CGCACAAGCCAAGATTCATCGT |
|      |           | R           | AACGCTCGCCTGGTCTAATCG  |
| 15   | Br-Lac-15 | F           | GAGGTTGGTGTGCGGTTTGGT  |
|      |           | R           | GGAGGCAAGTTAGGAGGTGGAG |
| 16   | Br-Lac-16 | F           | TCTCGCCAACCACCGTTCACT  |
|      |           | R           | TCCATCTGCCCAACCTGTCCTC |
| 17   | Br-Lac-17 | F           | TACGGTCTGGTTGGGCTGATGG |
|      |           | R           | GCGTTGCTTGGCGAATGATTGC |
| 18   | Br-Lac-22 | F           | TAACCTCACCAACAGCGTCAGC |
|      |           | R           | TGCCATAGAAGCGTTCCTCGTT |
